# Supplementary material for: Where Have All the Parasites Gone? Modelling Early Malaria Parasite Sequestration Dynamics
Source: PLoS One. 2013 Feb 18;8(2):e55961. doi: 10.1371/journal.pone.0055961 (PMC3575381; doi:10.1371/journal.pone.0055961)
Supplement: Appendix S1 — Deriving an expression for the Ratio, R. (DOCX) [file pone.0055961.s003.docx]

# Appendix S1

### Deriving an expression for the Ratio, *R*

Equations *6a* and *b* and *1c* in the main paper lead to an expression for *R* as:

Therefore *R* does not depend on the starting numbers of iRBC in either compartment.
